# Supplementary material
Source: PubMed Central journal article supplement (PMC7489969)
Supplement: Olaisen_Supp_Apps.pdf [file Olaisen_Supp_Apps.pdf]

## Supplemental materials for:

Olaisen R, Schluchter MD, Flocke SA, Smyth KA, Koroukian SM, Stange KC. Assessing the longitudinal impact of physician-patient relationship on functional health. *Ann Fam Med*. 2020;18(5):422-429.

### Supplemental Appendix 1: Items that comprise the MEPS-PC Relationship subscale

| #  | Question                                                                                                                                                                                                                            | Section |
|----|-------------------------------------------------------------------------------------------------------------------------------------------------------------------------------------------------------------------------------------|---------|
| 1  | In the last 12 months, when you needed care right away how often did you get care as soon as you thought you needed [for illness, injury, or condition that needed care right away in a clinic, emergency room, or doctor's office] | SAQ     |
| 2  | In the last 12 months, not counting the times you needed care right away, how often did you get an appointment for your health care at a doctor's office or clinic as soon as you thought you needed?                               | SAQ     |
| 3  | In the last 12 months, how often was it easy to get the care, tests, or treatment you or a doctor believed necessary?                                                                                                               | SAQ     |
| 4  | In the last 12 months, how often did doctors or other health providers listen carefully to you?                                                                                                                                     | SAQ     |
| 5  | In the last 12 months, how often did doctors or other health providers explain things in a way that was easy to understand?                                                                                                         | SAQ     |
| 6  | In the last 12 months, how often did doctors or other health providers show respect for what you had to say?                                                                                                                        | SAQ     |
| 7  | In the last 12 months, how often did doctors or other health providers spend enough time with you?                                                                                                                                  | SAQ     |
| 8  | In the last 12 months, how often were these instructions [about what to do about a specific illness or health condition] easy to understand?                                                                                        | AC      |
| 9  | In the last 12 months, how often did doctors or other health providers ask you to describe how you were going to follow instructions [about what to do about a specific illness or health condition]?                               | SAQ     |
| 10 | In the last 12 months, how often was it easy to see a specialist that you needed to see?                                                                                                                                            | SAQ     |
| 11 | If there were a choice between treatments, how often would [a medical person at] [PROVIDER] ask (patient) to help make the decision?                                                                                                | AC      |
| 12 | Thinking about the types of medical, traditional and alternative treatments that (patient) is happy with, how often does [a medical person at] [PROVIDER] show respect for these treatments?                                        | AC      |
| 13 | How difficult is it to contact [a medical person at] [PROVIDER] after their regular hours in case of urgent medical needs?                                                                                                          | AC      |
| 14 | How difficult is it to contact [a medical person at] [PROVIDER] during regular business hours over the telephone about a health problem?                                                                                            | AC      |

NOTES: AC = Access to Care section, completed during in-person interview; SAQ=Self-Administered Questionnaire, administered via mail-in survey. Answer choices in SAQ are: never, sometimes, usually, always; while in AC very difficult, somewhat difficult, not too difficult, not at all difficult.

Source: Agency for Healthcare Research and Quality, Medical Expenditure Panel Survey.

**Supplemental Figure 1** : Illustration of the statistical approach to construct (6) mutually exclusive physician-patient relationship trajectories

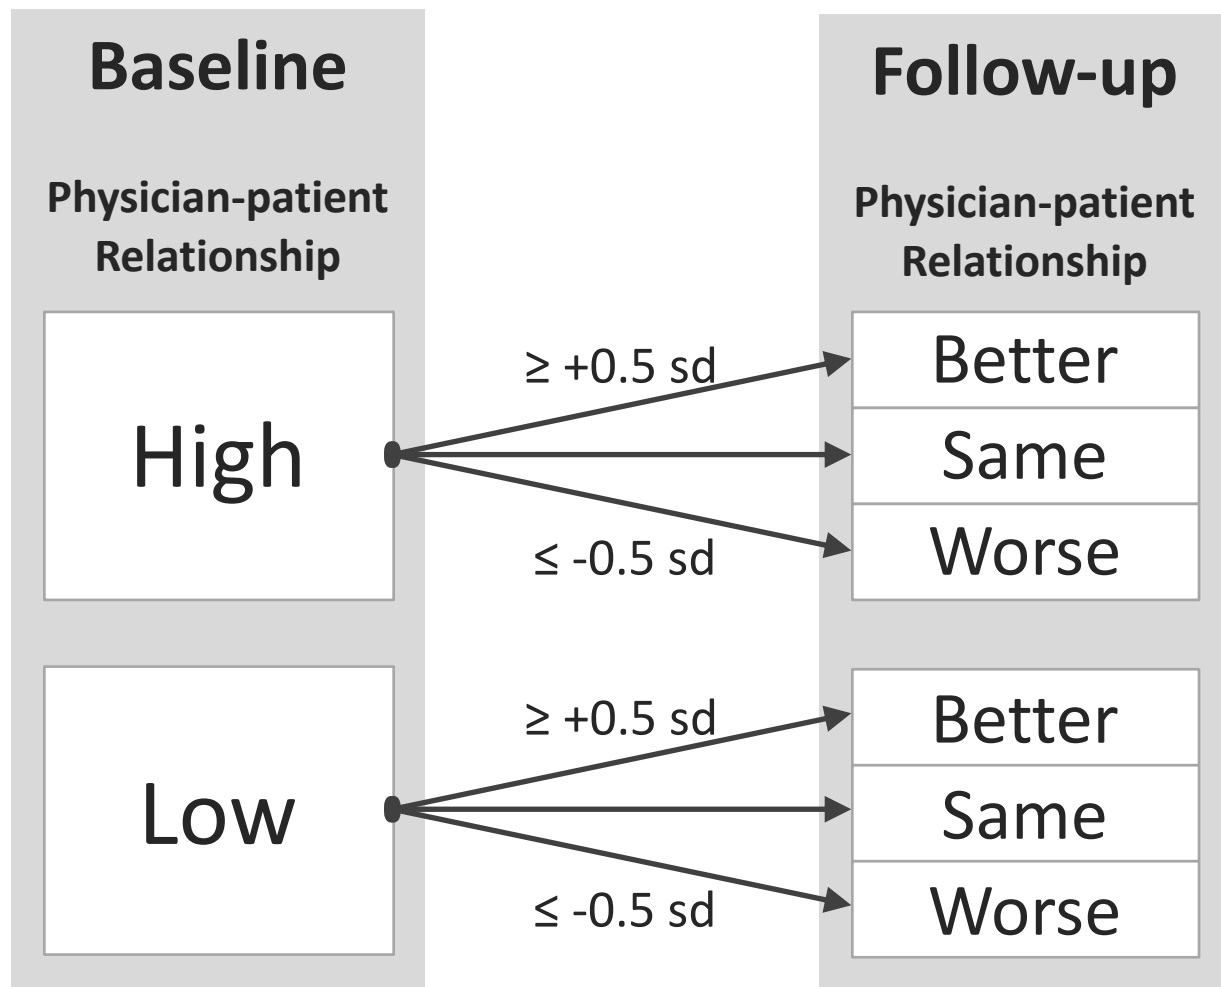

Physician-patient relationship operationalized with the MEPS-PC Relationship composite subscale with evidence of preliminary reliability and validity.

Data on two time points, one year apart, where baseline reflects 2015 and follow-up reflects 2016 physician-patient relationship scores.

Individuals classified at baseline into one of two categories: low or high, depending on whether the individual's baseline physician-patient relationship score was above or below the population median physician-patient relationship score. Then, depending on whether the individual's follow-up physician-patient relationship score changed  $\pm 0.5$  standard deviation (sd) to baseline, they were assigned into one of three possible follow-up trajectories (Same, Worse, Better).

**Supplemental Figure 2 :** Correlation between physician–patient relationship in 2015 and functional health outcome (SF-12) in 2016 among U.S. adults with office visits in both 2015 and 2016.

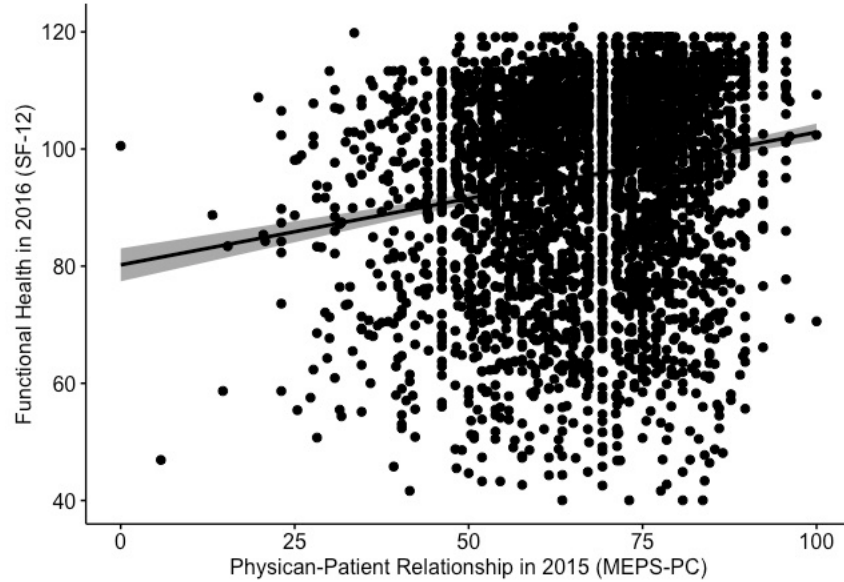

Source: Agency for Healthcare Research and Quality, Medical Expenditure Panel Survey, Longitudinal Panel, HS193 (2015–2016).

**Supplemental Table 1: Comparisons between different trajectories in physician-patient relationship and impact on functional health in a nationally representative sample of US adults with physician-office visits in both 2015 and 2016.**

| Physician-patient relationship | Estimate | SE   | Z     | P      | Sign |
|--------------------------------|----------|------|-------|--------|------|
| High→Same vs. High→Better      | -2.56    | 0.60 | -4.28 | <0.001 | ***  |
| High→Worse vs. High→Better     | -5.10    | 0.93 | -5.5  | <0.001 | ***  |
| Low→Better vs. High→Better     | -0.18    | 0.68 | -0.27 | 1      |      |
| Low→Same vs. High→Better       | -2.37    | 0.99 | -2.39 | 0.141  |      |
| Low→Worse vs. High→Better      | -3.47    | 1.56 | -2.22 | 0.204  |      |
| High→Worse vs. High→Same       | -2.54    | 0.95 | -2.67 | 0.071  | *    |
| Low→Better vs. High→Same       | 2.38     | 0.91 | 2.62  | 0.081  | *    |
| Low→Same vs. High→Same         | 0.19     | 1.09 | 0.18  | 1      |      |
| Low→Worse vs. High→Same        | -0.91    | 1.59 | -0.58 | 0.991  |      |
| Low→Better vs. High→Worse      | 4.91     | 1.03 | 4.79  | <0.001 | ***  |
| Low→Same vs. High→Worse        | 2.73     | 1.15 | 2.36  | 0.15   |      |
| Low→Worse vs. High→Worse       | 1.62     | 1.69 | 0.96  | 0.919  |      |
| Low→Same vs. Low→Better        | -2.18    | 0.83 | -2.63 | 0.078  | *    |
| Low→Worse vs. Low→Better       | -3.29    | 1.56 | -2.11 | 0.254  |      |
| Low→Worse vs. Low→Same         | -1.10    | 1.60 | -0.69 | 0.98   |      |

\*\*\* denotes  $P < 0.001$  while \* denotes  $P < 0.10$ .

Physician-patient relationship trajectories are based on six mutually exclusive, one-year change groups defined by a) individual score on the physician-patient relationship in 2015 (a binary category, defined at the population median) and b) individual score on physician-patient relationship in 2016 compared to 2015 (a three-level ordinal variable defined by  $\pm 0.5$  standard deviation).

Comparison made with survey-weighted, covariate adjusted generalized linear model, and tested with Tukey multiple pairwise comparison not adjusted for multiple testing (Bonferroni).

Covariates in model included age group, sex, race-ethnicity, educational attainment, insurance status, multimorbidity, U.S. region, and baseline relationship score using survey-weighted predicted marginal means.

Source: Agency for Healthcare Research and Quality, Medical Expenditure Panel Survey, Longitudinal Panel, HS193 (2015–2016), and Medical Conditions, HS190, 2015.
